# Supplementary material
Source: PubMed Central journal article supplement (PMC6868898)
Supplement: ao9b02830_si_001.pdf [file ao9b02830_si_001.pdf]

# **High Surface Area Sodium Tantalate Nanoparticles with Enhanced Photocatalytic and Electrical Properties Prepared through Polymeric Citrate Precursor Route**

**Umar Farooq<sup>1</sup>, Jahangeer Ahmed<sup>2</sup>, Saad M. Alshehri<sup>2</sup> and Tokeer Ahmad<sup>1\*</sup>**

<sup>1</sup>Nanochemistry Laboratory, Department of Chemistry, Jamia Millia Islamia, New Delhi-110025, INDIA

<sup>2</sup>Department of Chemistry, College of Science, King Saud University, Riyadh 11451, Saudi Arabia

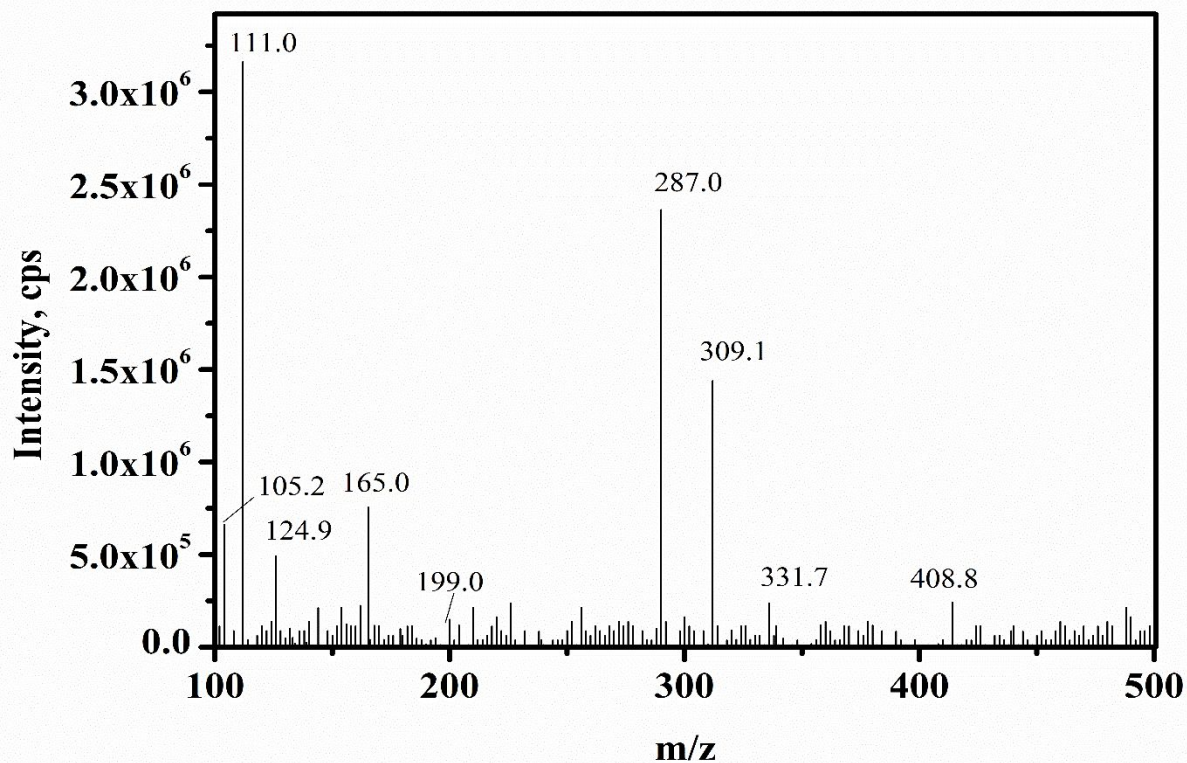

Figure S1. Mass spectra of MB dye after degradation in presence of NaTaO<sub>3</sub> photocatalyst at neutral pH.

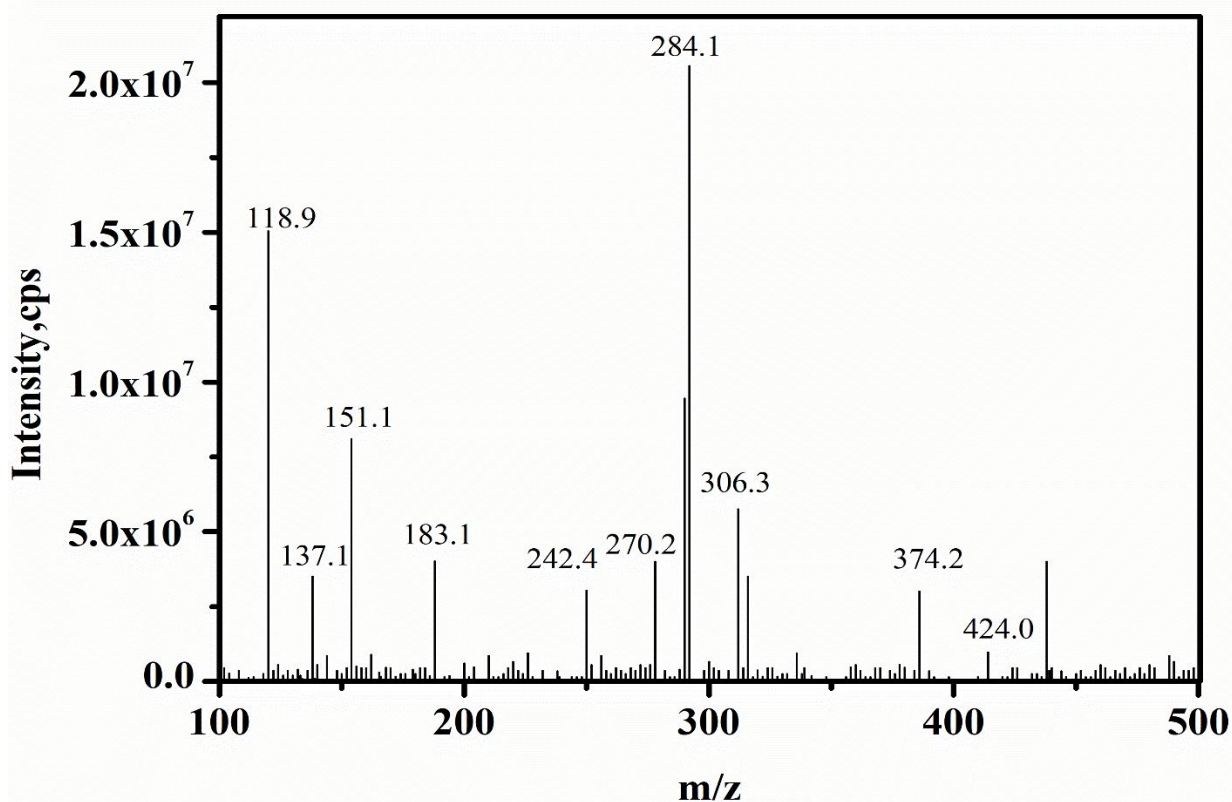

Figure S2. Mass spectra of MB dye after degradation in presence of NaTaO<sub>3</sub> photocatalyst at alkaline pH.

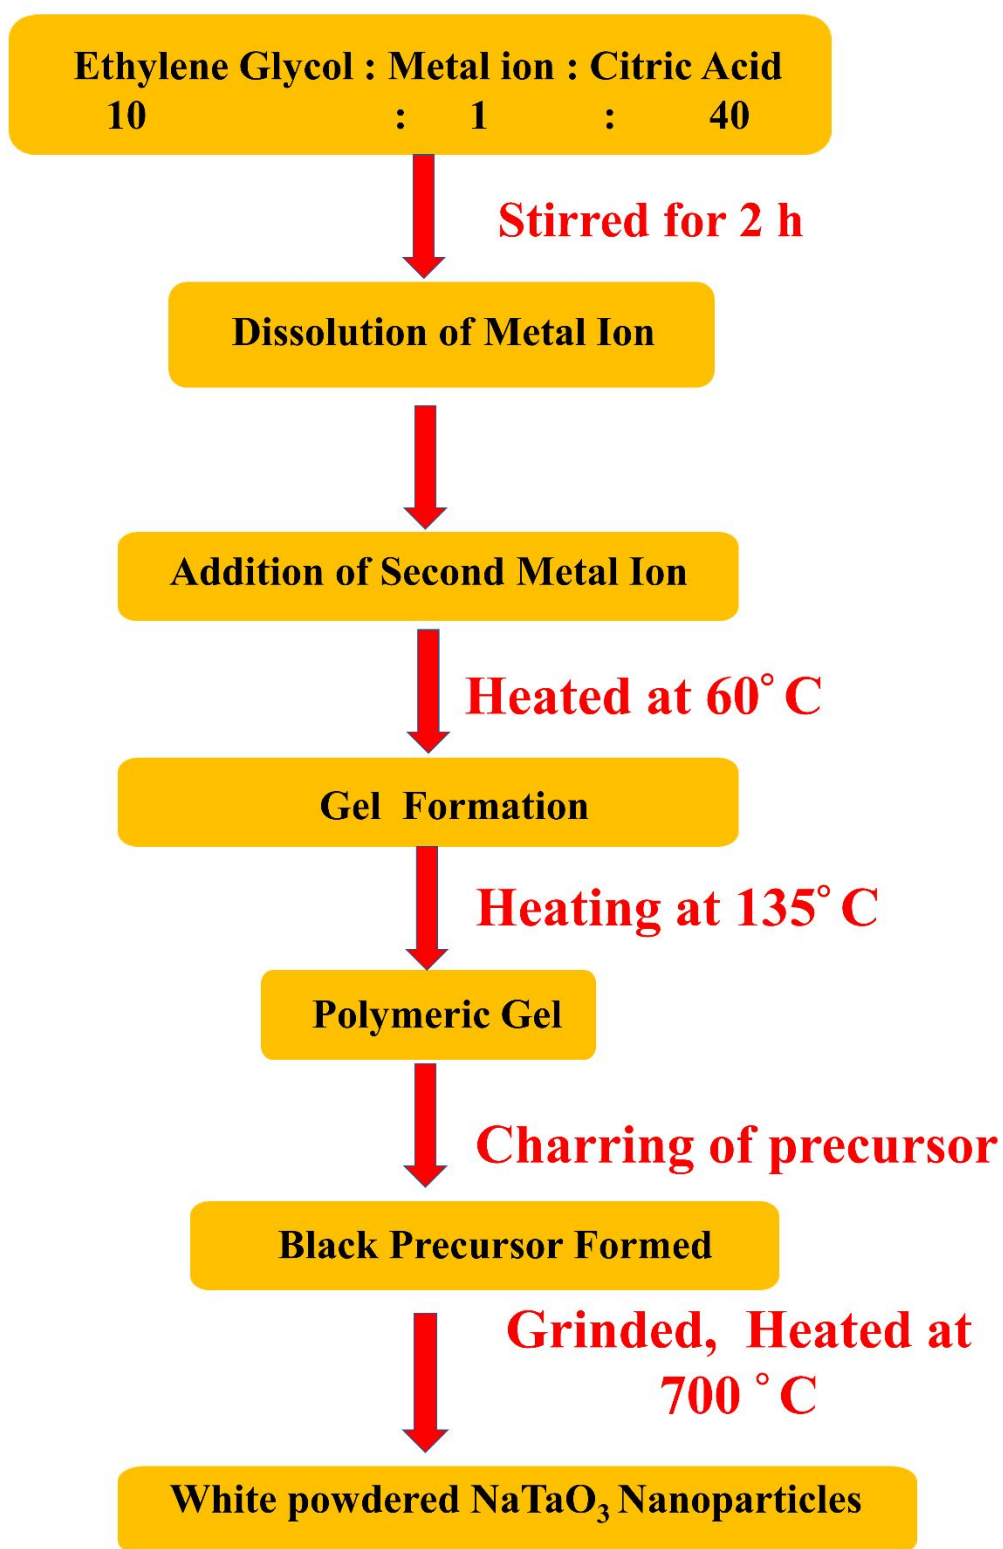

**Figure S3.** Reaction Scheme for Synthesis of NaTaO<sub>3</sub> Nanoparticles.
